# Supplementary material for: Rapid Microwave Synthesis of β-SnWO4 Nanoparticles: An Efficient Anode Material for Lithium-Ion Batteries
Source: Research Square preprint supplement (doi:10.21203/rs.3.rs-113681/v1), 2020-12-04
Supplement: Supplementary file 1 [file dce2d18b3cef65ba68cdbb88.docx]

**Table 1** Data obtained through Rietveldrefinement of the diffraction data of β-SnWO4

| *Rexp* | *Rp* | *Rwp* | *Dstatics* | *Wt. Dstatics* | *χ2* |  |
| --- | --- | --- | --- | --- | --- | --- |
| 10.84 | 13.73 | 18.04 | 0.44 | 0.56 | 2.77 |  |
